# Supplementary material
Source: MDPI journal article supplement (https://www.mdpi.com/2313-0105/9/3/189)
Supplement: s1 [file s1]

## Supplementary information

# Investigation of the Electrochemical Behaviour of Al Current Collector Material Polarised Highly Anodically and Located in Butyltrimethylammonium Bis(trifluoromethylsulfonyl)imide Room-Temperature Ionic Liquid

Jaanus Kruusma <sup>1</sup>, Tanel Käämbre <sup>2</sup>, Arvo Tõnisoo <sup>2</sup>, Vambola Kisand <sup>2</sup>, Karmen Lust <sup>1</sup> and Enn Lust <sup>1,\*</sup>

<sup>1</sup> Institute of Chemistry, University of Tartu, Ravila 14a, 50411 Tartu, Estonia; jaanus.kruusma@ut.ee (J.K.)

<sup>2</sup> Institute of Physics, University of Tartu, W. Ostwaldi 1, 50411 Tartu, Estonia

\* Correspondence: enn.lust@ut.ee; Tel.: +372-737-5165; Fax: +372-737-5264

# N4111(TFSI) | Al, C 1s, -CF<sub>3</sub>

a

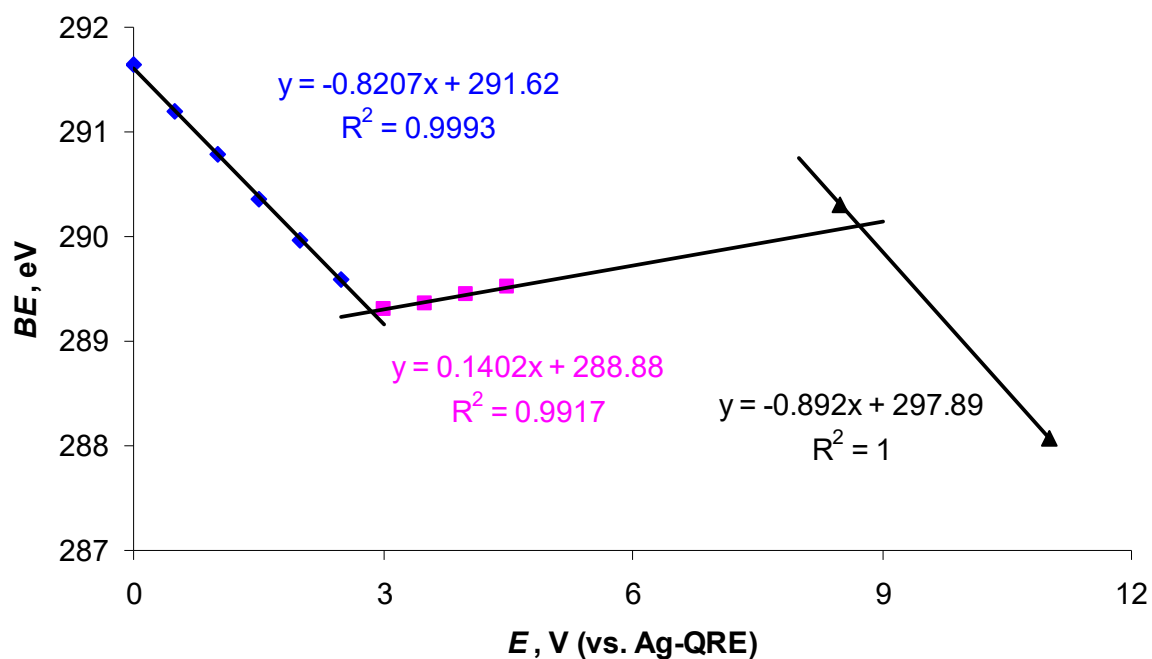

# N4111(TFSI) | Al, C 1s, C-N

b

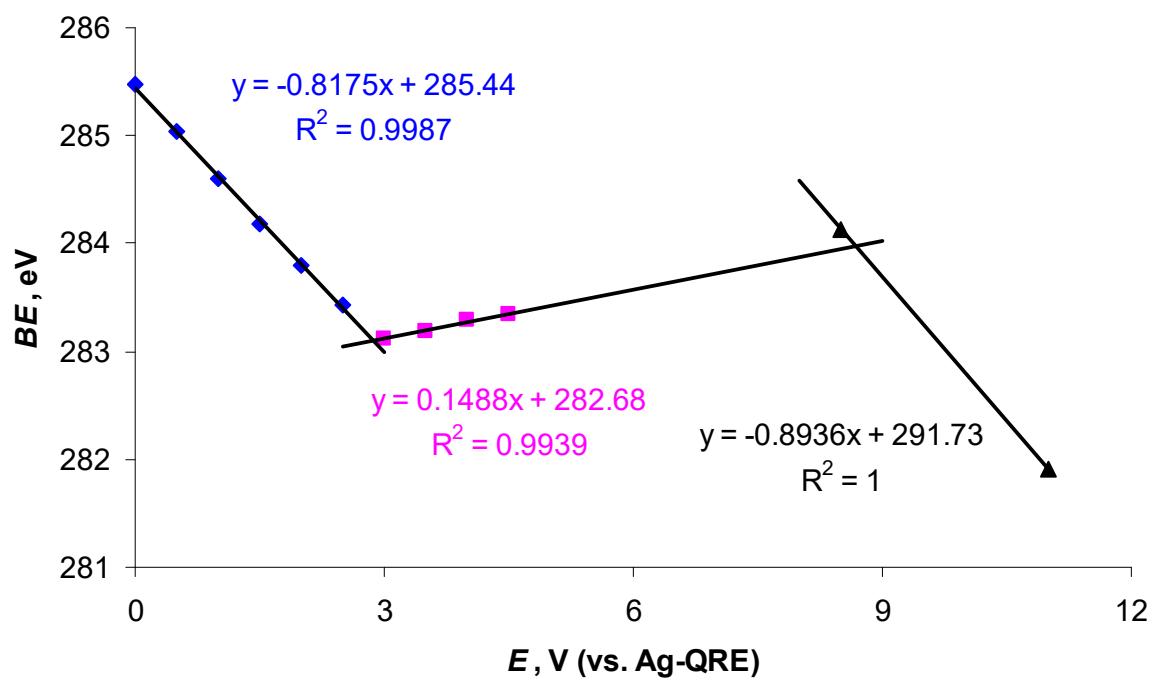

# N4111(TFSI) | Al, C 1s, C-H

c

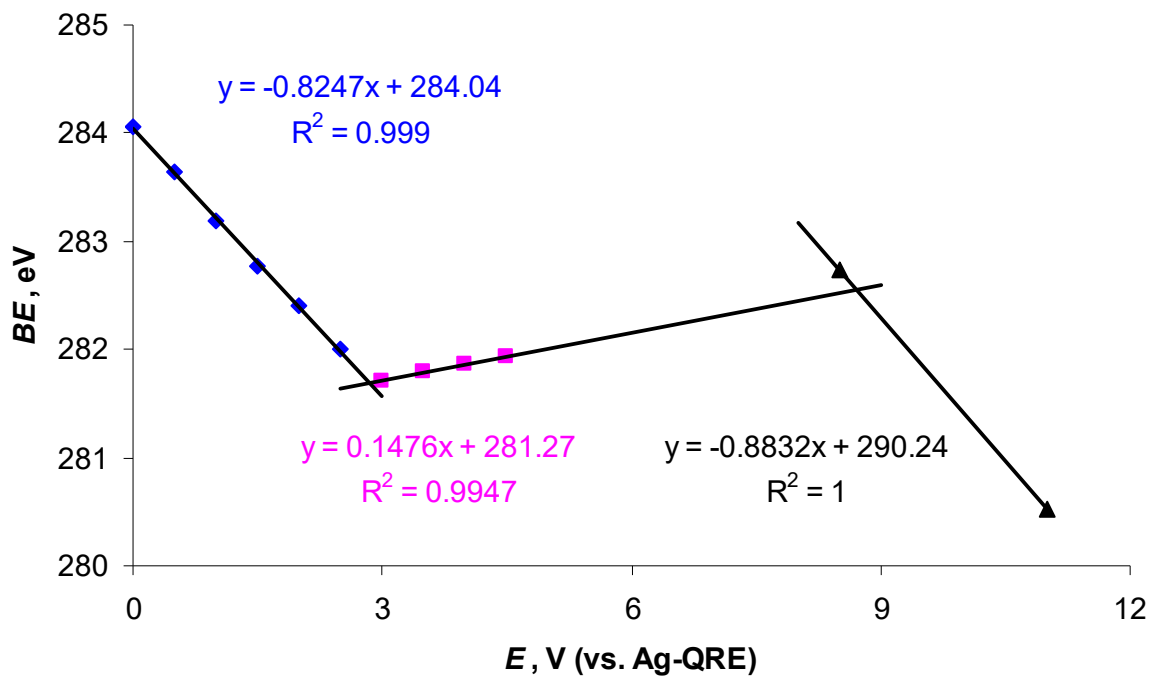

# N4111(TFSI) | Al, N 1s, N-S

d

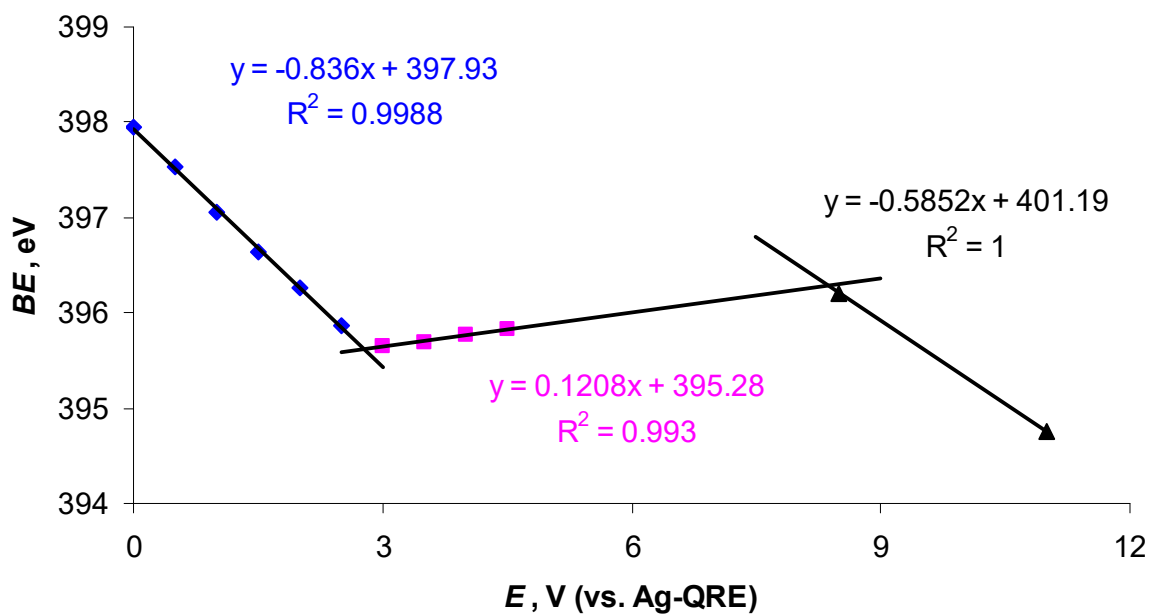

# N4111(TFSI) | Al, N 1s, N-C

e

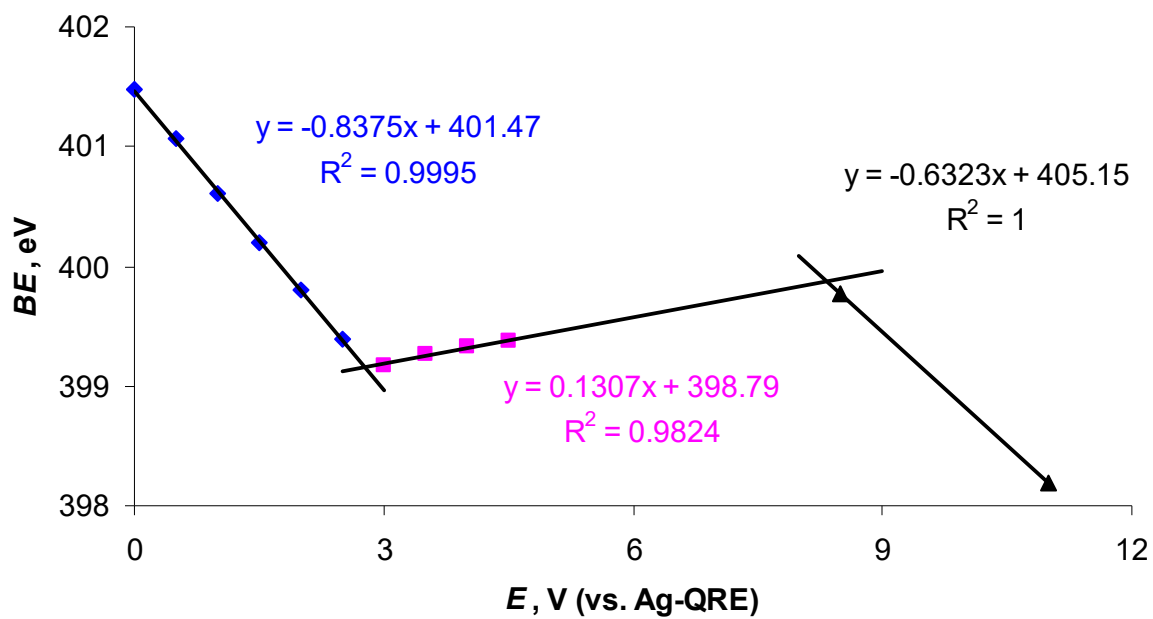

# N4111(TFSI) | Al, O 1s, O=S

f

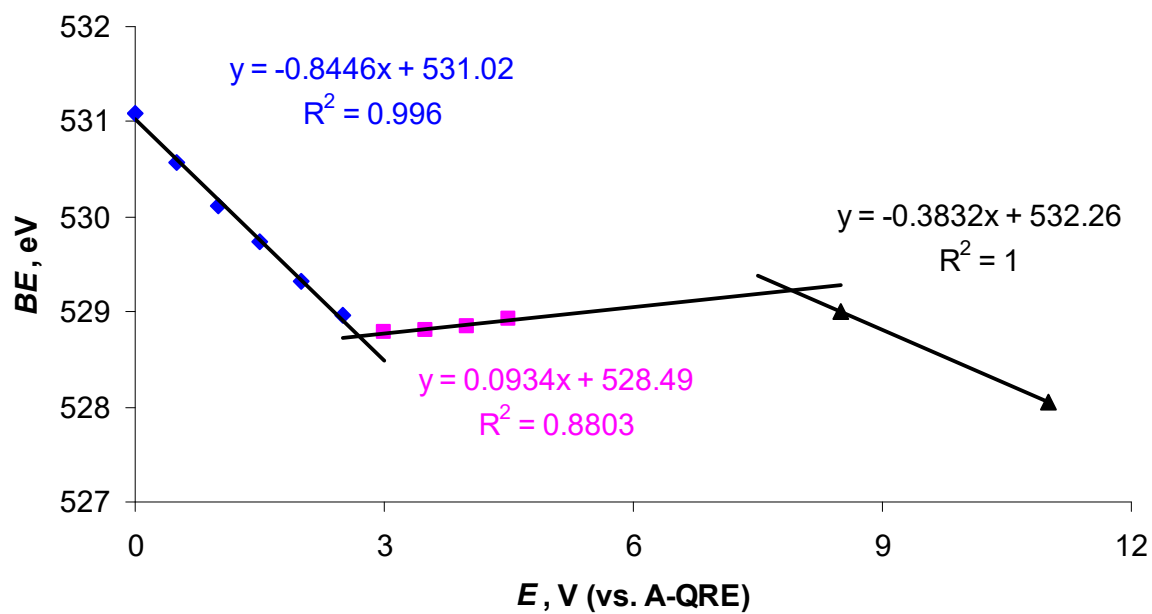

# N4111(TFSI) | Al, S 2p<sub>3/2</sub>

g

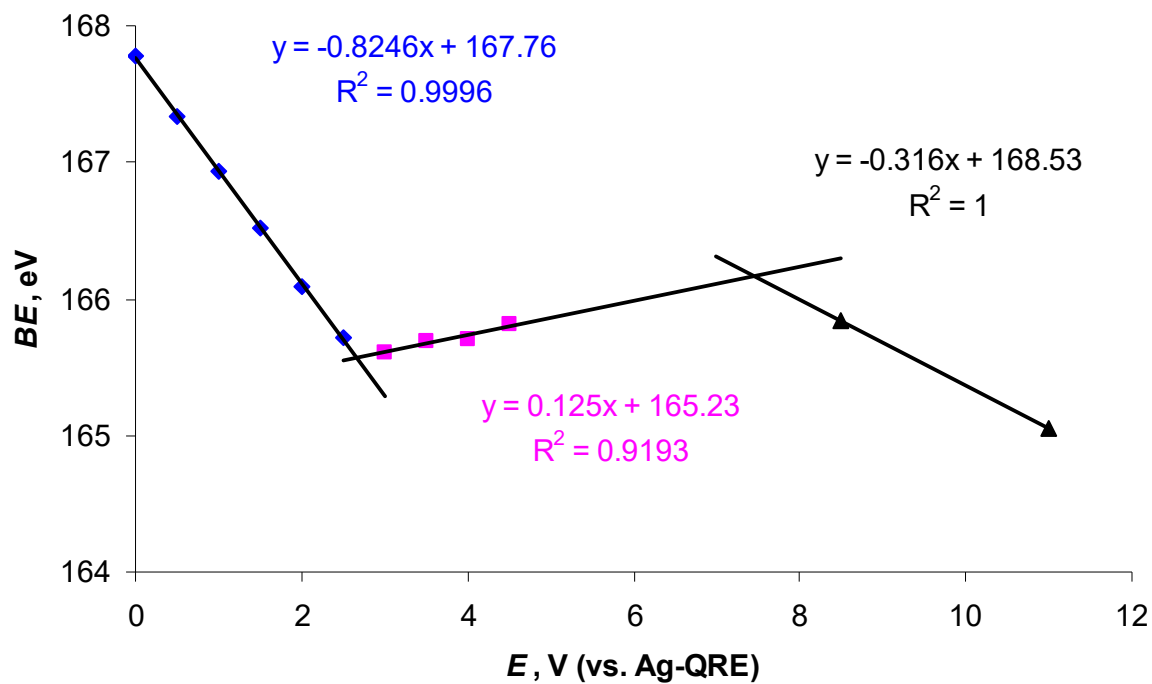

# N4111(TFSI) | Al, S 2p<sub>1/2</sub>

h

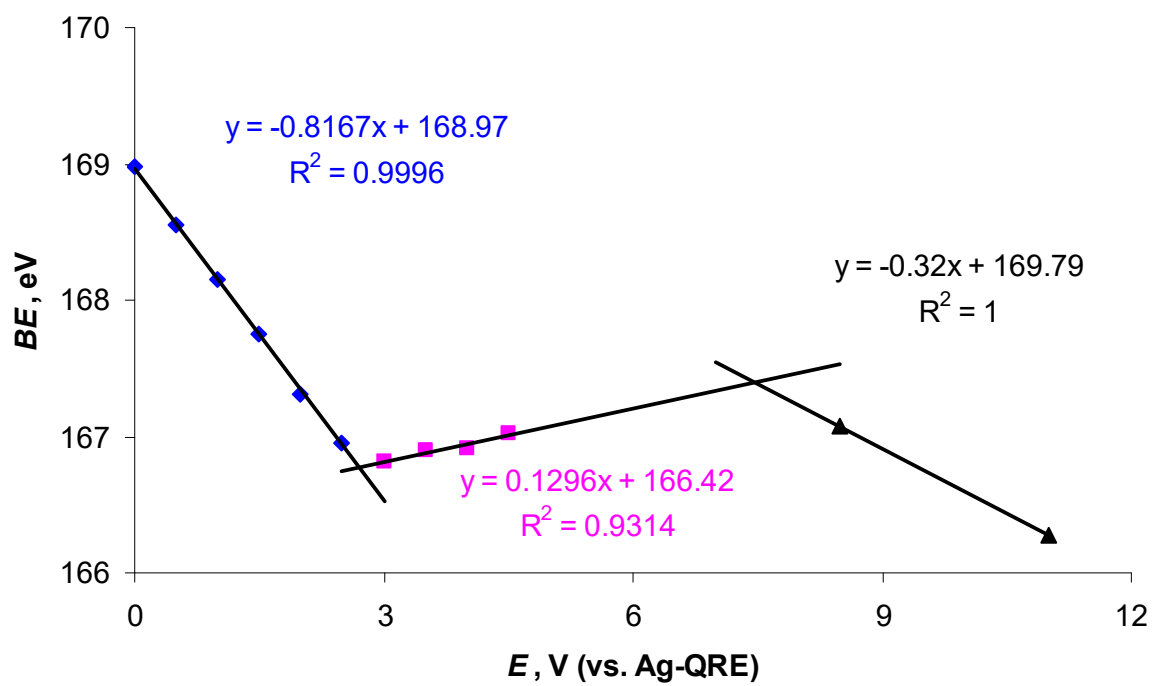

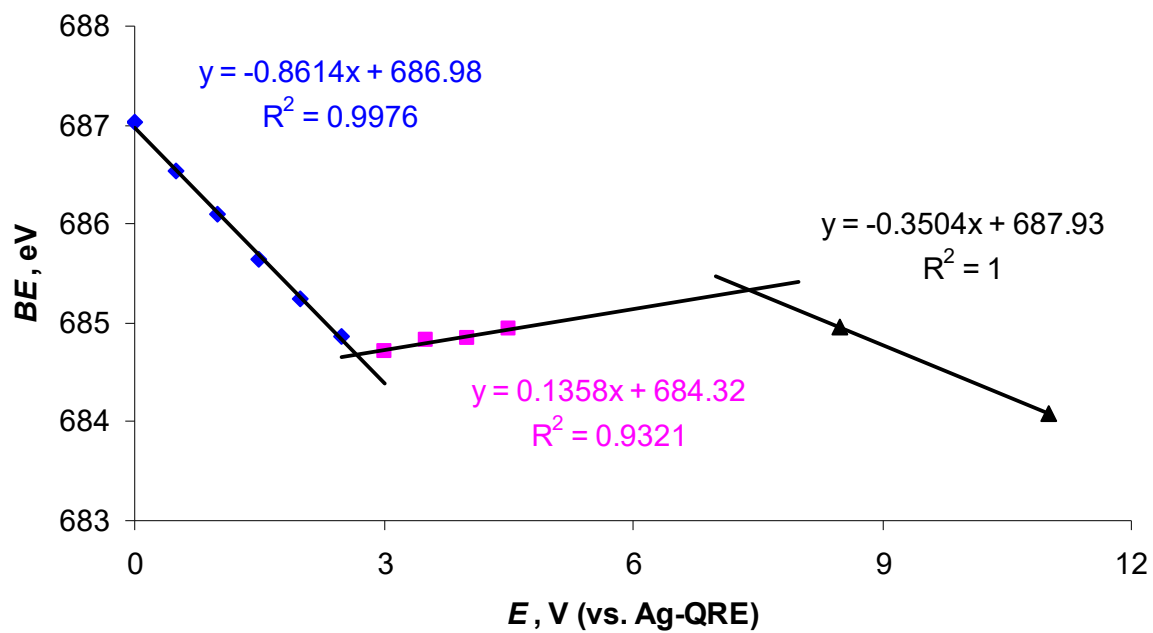

Figure S1a-i. *BE* vs. *E* relationships for the elements forming butyltrimethylammonium bis(trifluoromethylsulfonyl)amide (N4111(TFSI)).

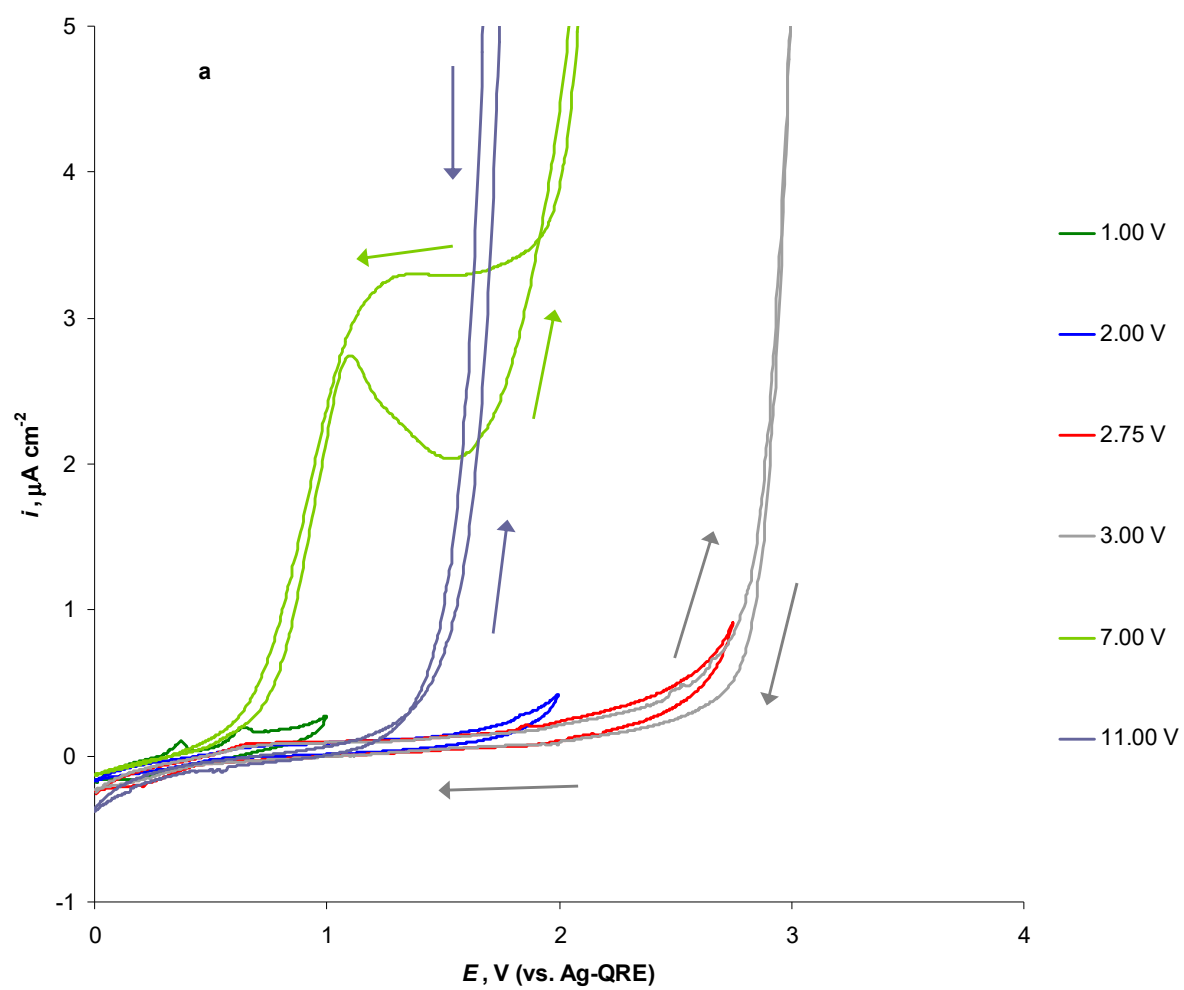

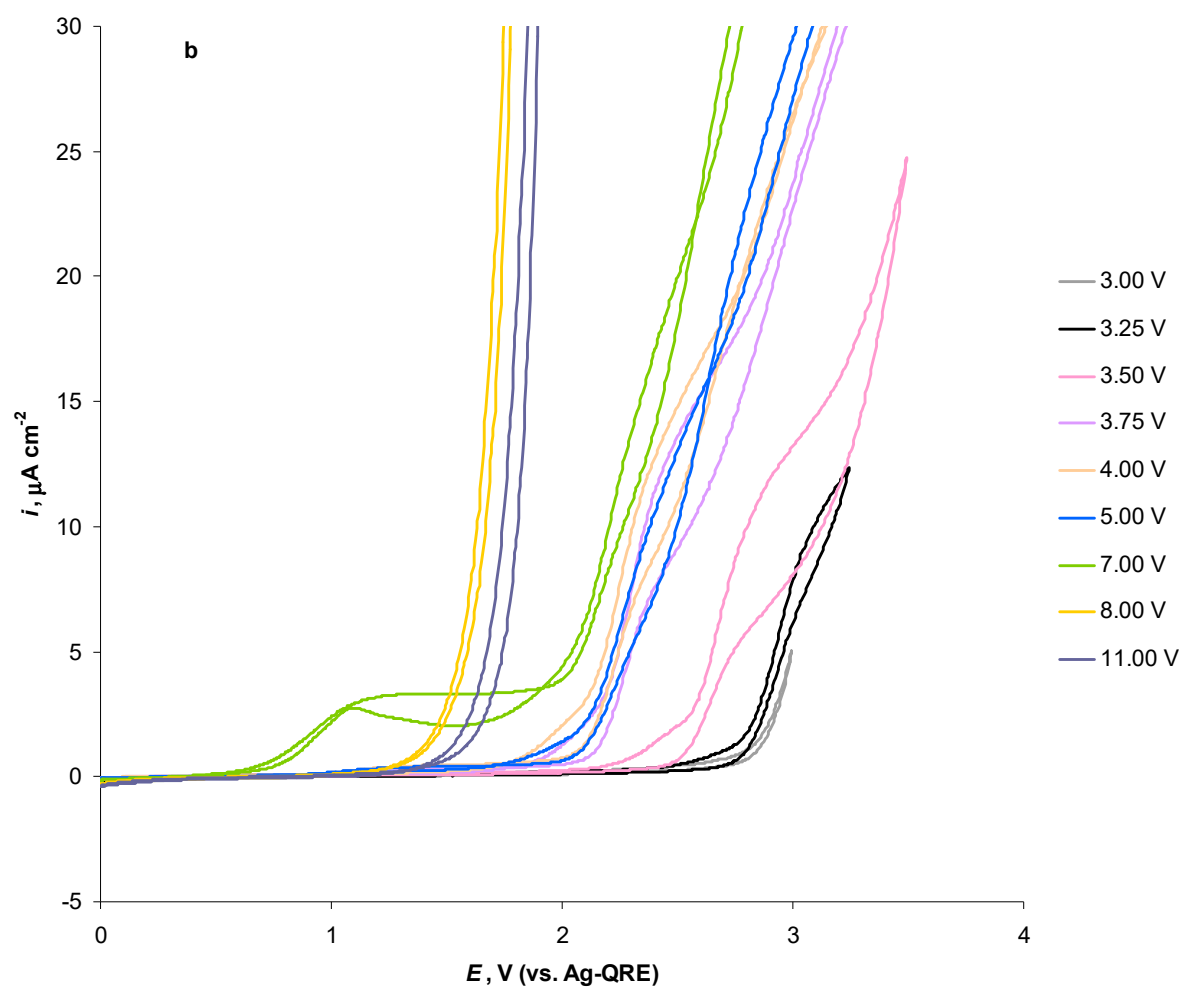



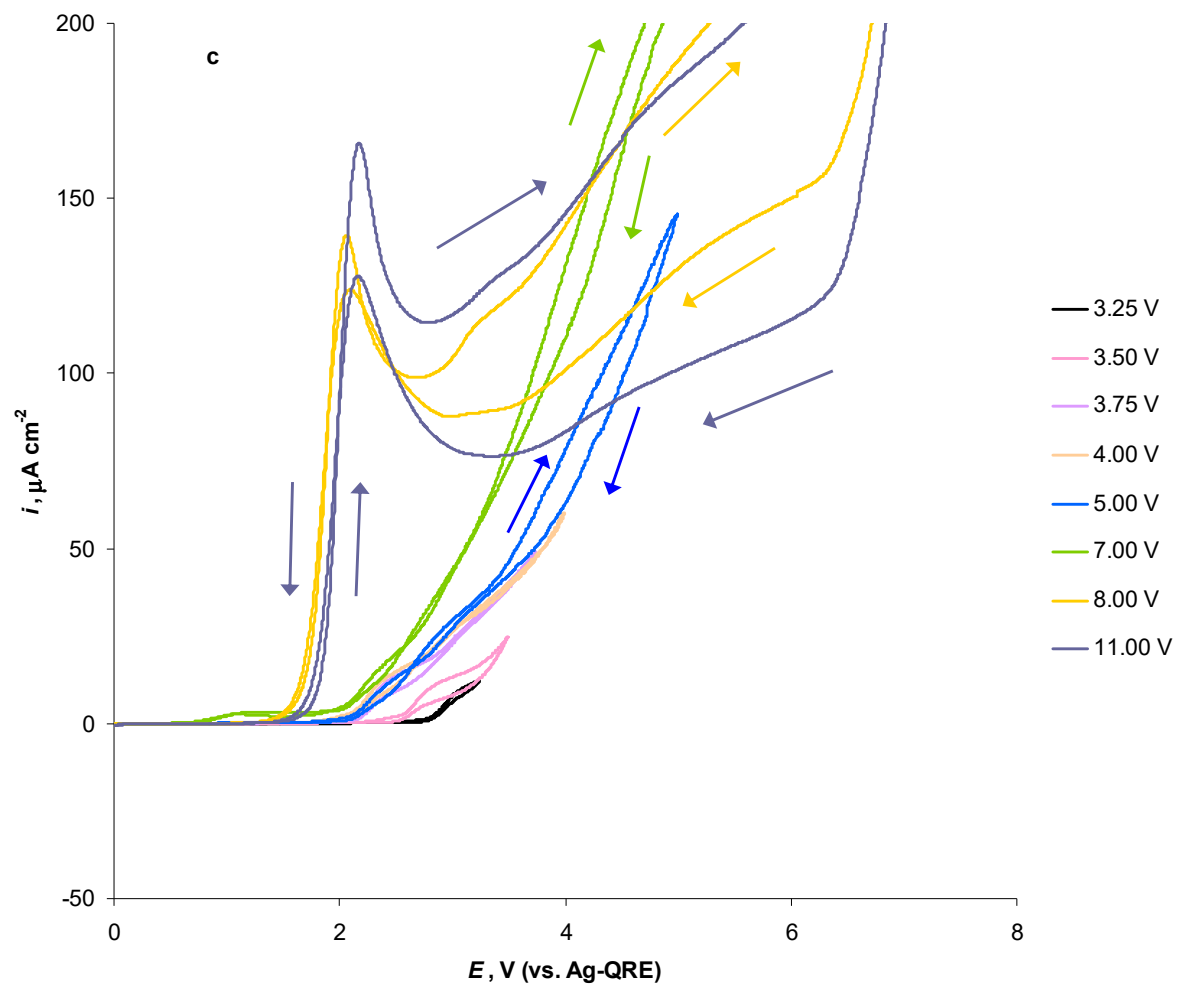

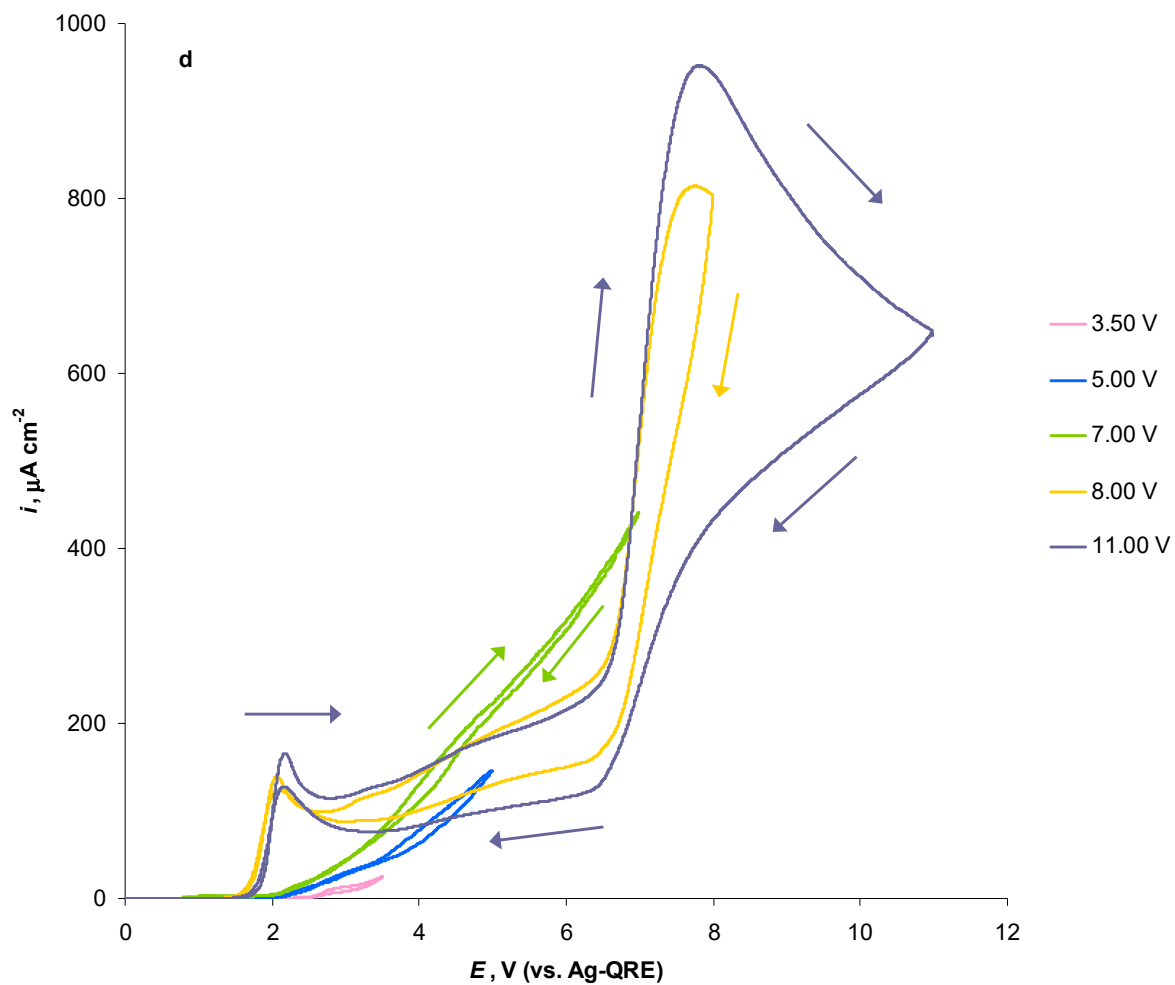

Figure S2a-d. The cyclic voltammograms (CV) measured within the potential range from 0.00 V to the final potentials (indicated in the figures) and reverse at the potential sweep rate 1.00 mV s<sup>-1</sup>. The measured CVs are shown in various current scales; the second CV sweeps are presented.

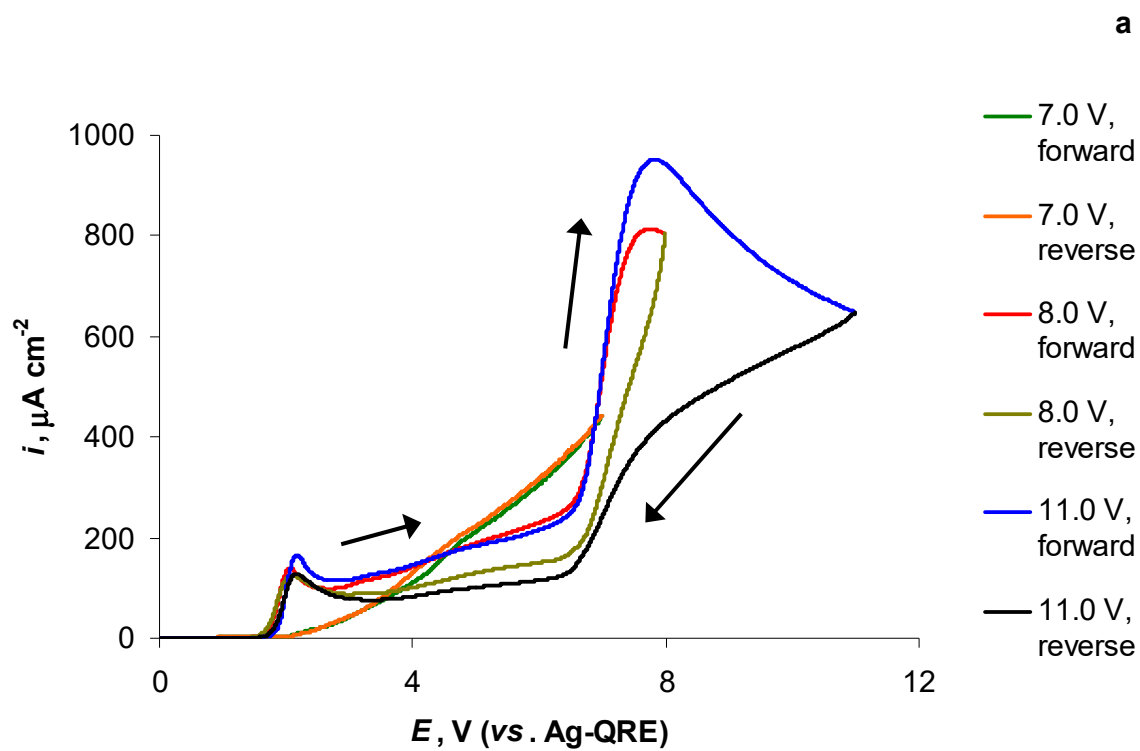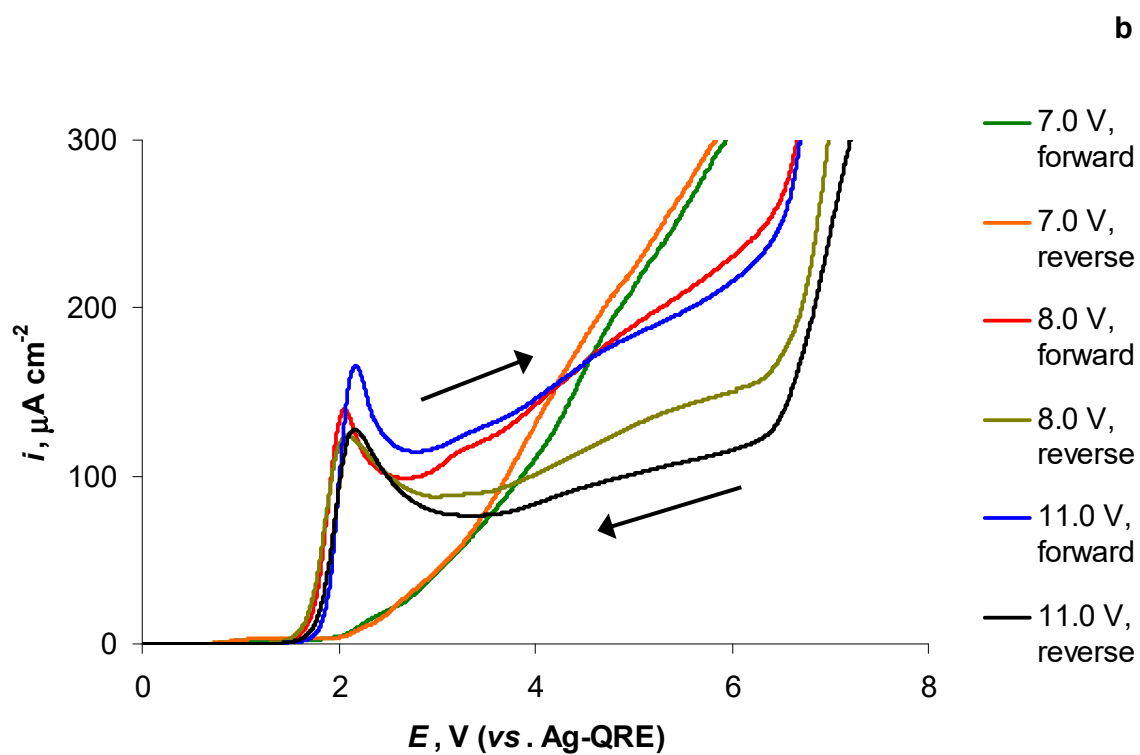

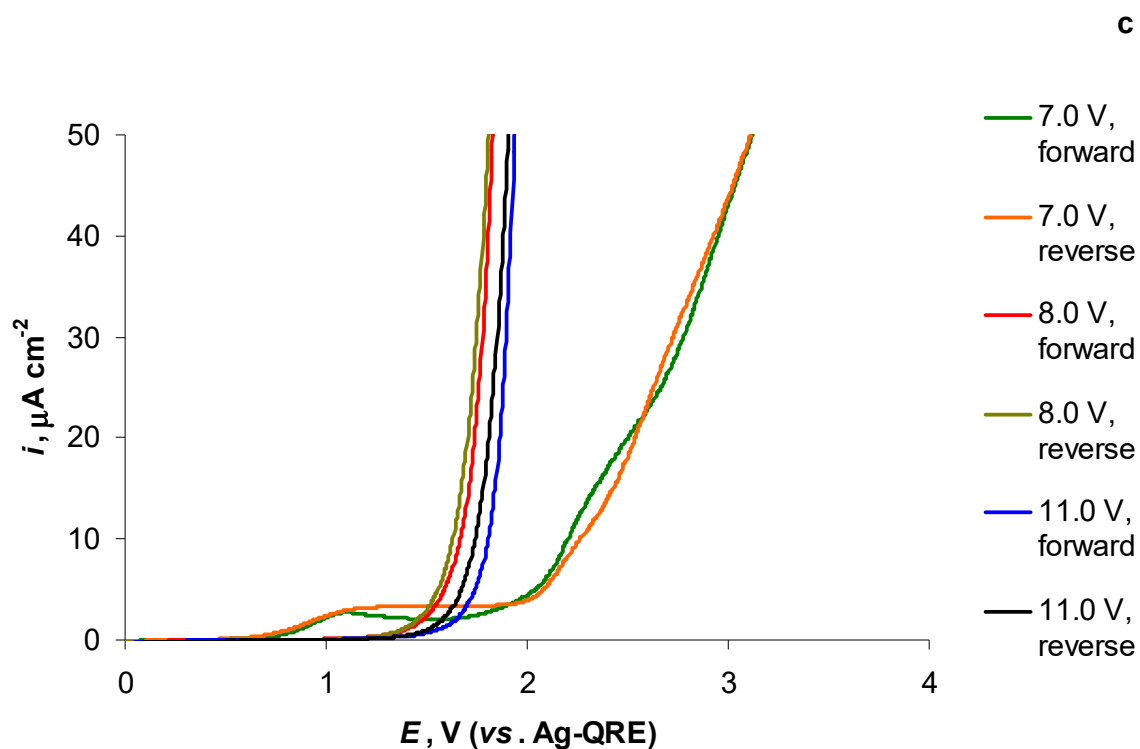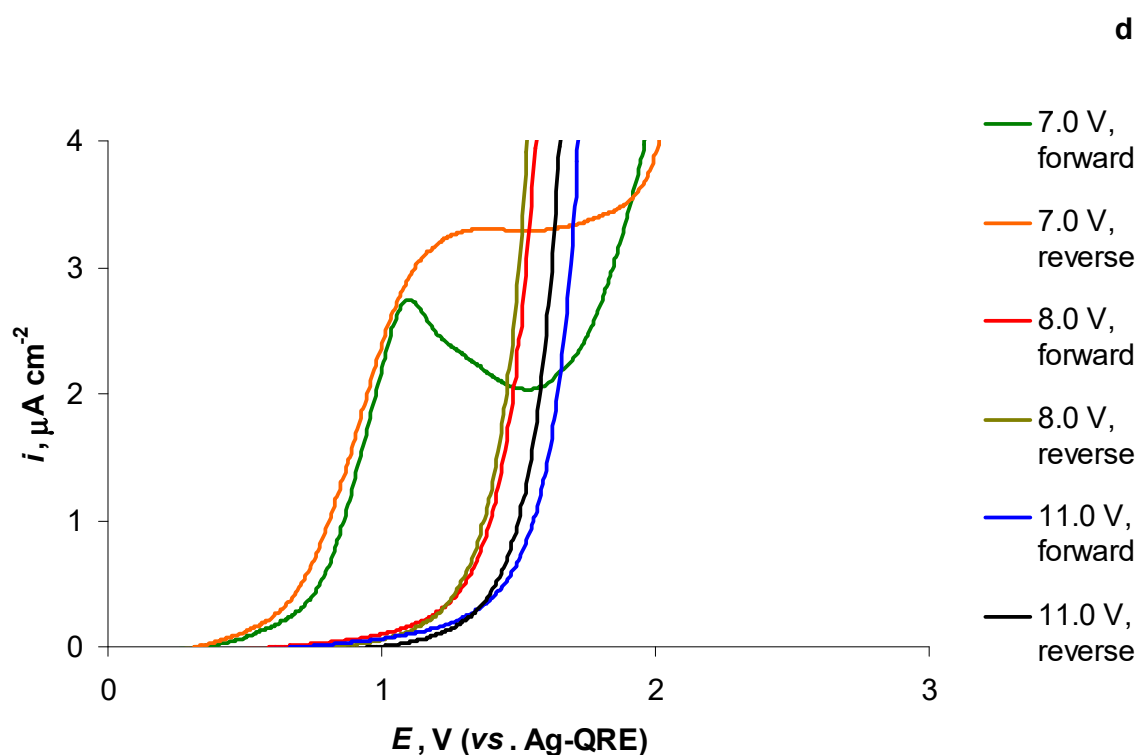

Figure S3a-d. The cyclic voltammograms (CV) measured within the potential range from 0.00 V to the final potentials (indicated in the figures) and reverse at the potential sweep rate 1.00  $\text{mV s}^{-1}$ . The measured CVs are shown in various current scales; the second CV sweeps are presented.

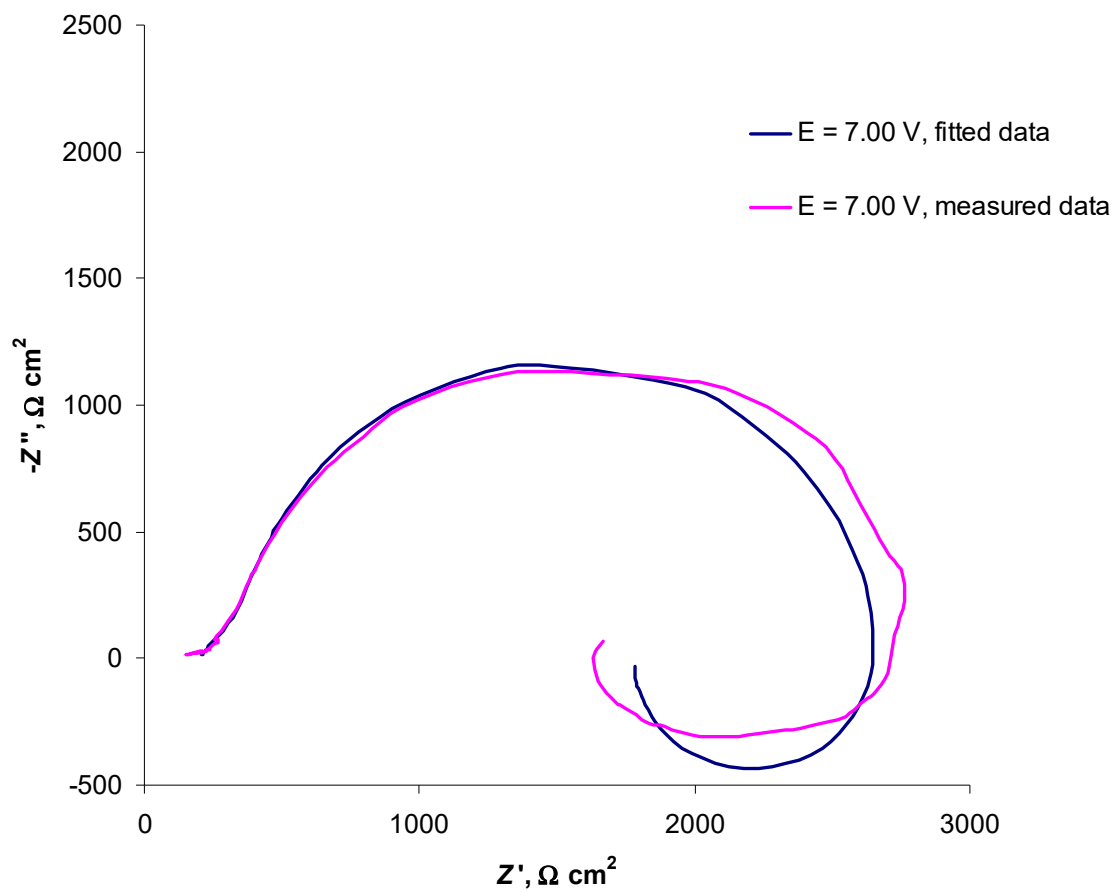

Figure S4. Nyquist plots measured for N4111(TFSI) | Al/Al<sub>2</sub>O<sub>3</sub> system at  $E = 7.00 \text{ V}$ : pink — measured data, dark blue — fitted data, using equivalent circuit shown in Scheme 2a.

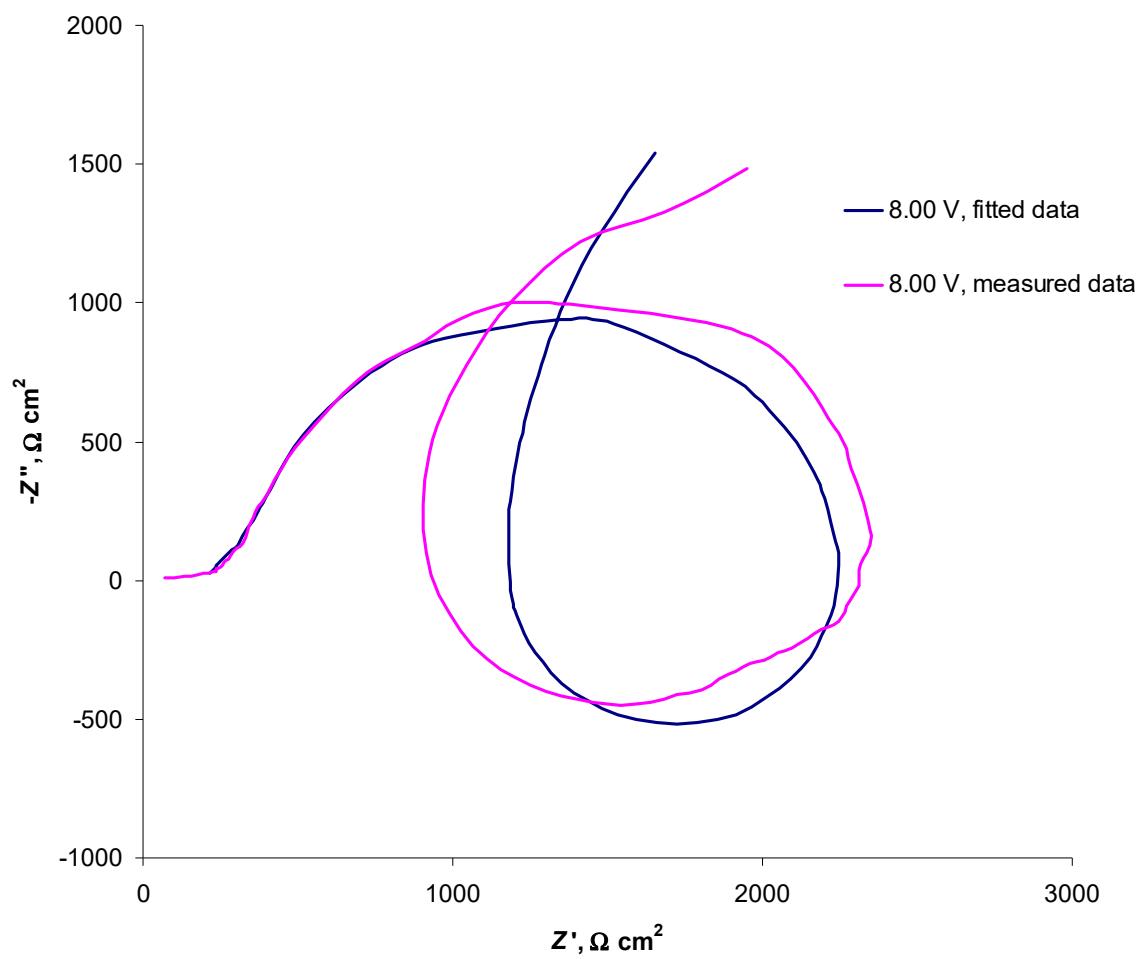

Figure S5. Nyquist plots measured for N4111(TFSI) | Al/Al<sub>2</sub>O<sub>3</sub> system at  $E = 8.00$  V: pink — measured data, dark blue — fitted data, using equivalent circuit shown in Scheme 2b.

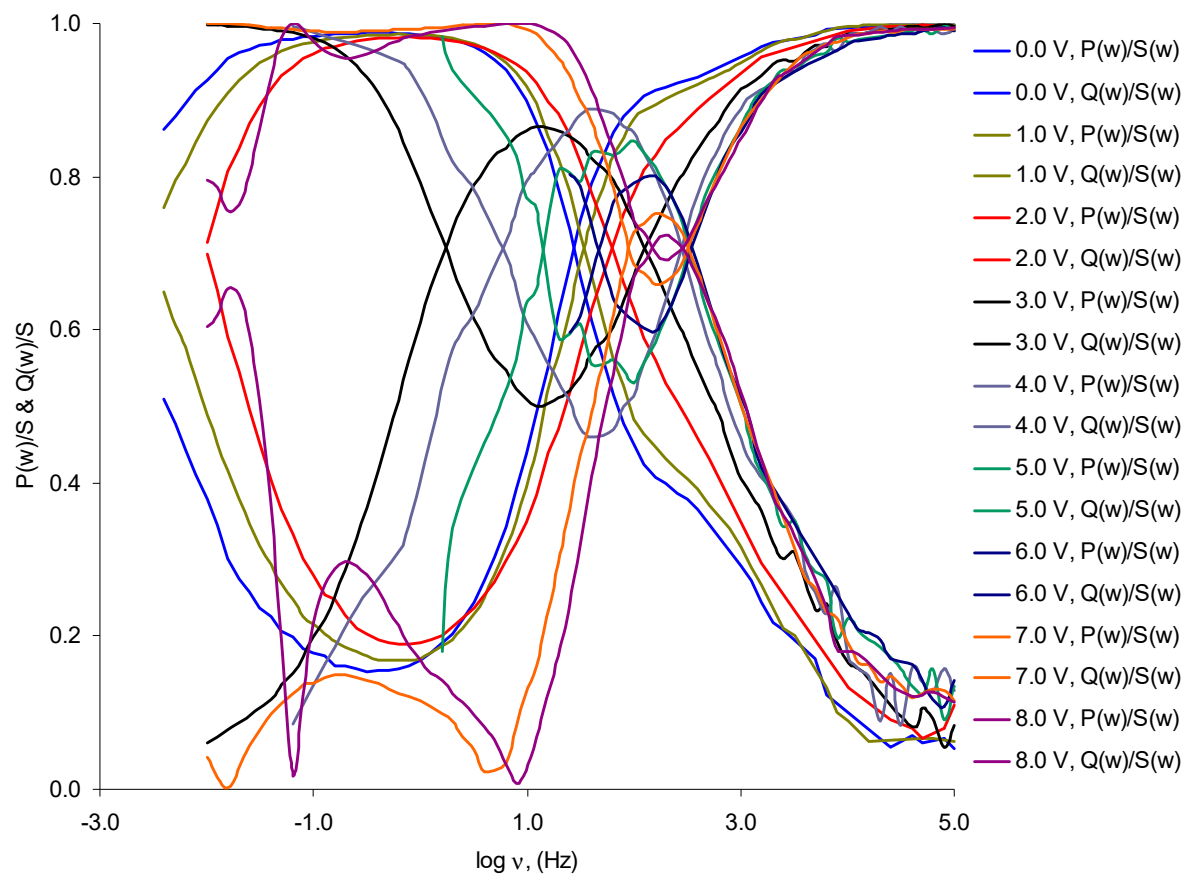

Figure S6. The complex power dependences for N4111(TFSI) | Al interface at various Al potentials applied.
